# Supplementary material for: Quantitative IgG response to SARS-CoV-2 membrane protein in infected individuals strongly correlates with lung injury
Source: PubMed Central journal article supplement — Sci Rep. 2024 Dec 28;14:30665. doi: 10.1038/s41598-024-78381-8 (PMC11681004; doi:10.1038/s41598-024-78381-8), 2024-12-28
Supplement: 41598_2024_78381_MOESM1_ESM.pdf [file 41598_2024_78381_MOESM1_ESM.pdf]

## Supplementary Data

### Supplementary Table S1

A

Descriptive

|                     | N  | Missing | Mean | Median | Minimum | Maximum |
|---------------------|----|---------|------|--------|---------|---------|
| Samples             | 63 | 0       |      |        |         |         |
| Age (years)         | 62 | 1       | 46.9 | 48     | 18      | 81      |
| Time elapsed (days) | 56 | 7       | 105  | 91.5   | 21      | 328     |

B

| Sex    | Lung injury |    | Total |
|--------|-------------|----|-------|
|        | 0           | 1  |       |
| Female | 10          | 3  | 13    |
| Male   | 23          | 27 | 50    |
| Total  | 33          | 30 | 63    |

**Samples description.** Panel A shows the main features of the samples collected. The time elapsed is the interval between the date of the molecular test positivity and the date of sera collection. Panel B shows the samples reporting lung injury (coded as 0 = non-injury and 1 = injury) stratified by gender.

## Supplementary Table S2

### Model Fit Measures

| Model | Deviance | AIC  | BIC  | R <sup>2</sup> McF | R <sup>2</sup> CS | R <sup>2</sup> N | Overall Model Test |    |         |
|-------|----------|------|------|--------------------|-------------------|------------------|--------------------|----|---------|
|       |          |      |      |                    |                   |                  | $\chi^2$           | df | p       |
| 1     | 68.5     | 74.5 | 80.9 | 0.215              | 0.257             | 0.343            | 18.7               | 2  | 0.00009 |

### Omnibus Likelihood Ratio Tests

| Predictor           | $\chi^2$ | df | p       |
|---------------------|----------|----|---------|
| Membrane OD/cut-off | 6.169    | 1  | 0.013   |
| SPIke_OD/cutoff     | 0.604    | 1  | 0.43691 |

### Model Coefficients - Lung injury

| Predictor           | Estimate | SE    | Z      | p       | Odds ratio | 95% Confidence Interval |        |
|---------------------|----------|-------|--------|---------|------------|-------------------------|--------|
|                     |          |       |        |         |            | Lower                   | Upper  |
| Intercept           | -2.886   | 0.884 | -3.266 | 0.00109 | 0.0558     | 0.00988                 | 0.315  |
| Membrane OD/cut-off | 1.551    | 0.756 | 2.053  | 0.04009 | 4.7161     | 1.0727                  | 20.734 |
| SPIke_OD/cutoff     | 0.188    | 0.243 | 0.776  | 0.43792 | 1.2073     | 0.75003                 | 1.943  |

**Interaction, Membrane-Spike, main effect.** The interaction between IgG anti-M antibodies and IgG anti-Spike antibodies, analysed by the logit function, resulted in a loss of statistical significance for the Spike protein and a lower odds ratio for the M protein.

### Supplementary Table S3

#### Model Fit Measures

| Model | Deviance | AIC  | BIC  | R <sup>2</sup> McF | R <sup>2</sup> CS | R <sup>2</sup> N | Overall Model Test |    |         |
|-------|----------|------|------|--------------------|-------------------|------------------|--------------------|----|---------|
|       |          |      |      |                    |                   |                  | $\chi^2$           | df | p       |
| 1     | 65.7     | 71.7 | 78.1 | 0.246              | 0.289             | 0.386            | 21.5               | 2  | 0.00002 |

#### Omnibus Likelihood Ratio Tests

| Predictor           | $\chi^2$ | df | p       |
|---------------------|----------|----|---------|
| Membrane OD/cut-off | 12       | 1  | 0.00053 |
| Nucl_OD/cutoff      | 3.35     | 1  | 0.06707 |

#### Model Coefficients - Lung injury

| Predictor           | Estimate | SE    | Z     | p       | Odds ratio | 95% Confidence Interval |        |
|---------------------|----------|-------|-------|---------|------------|-------------------------|--------|
|                     |          |       |       |         |            | Lower                   | Upper  |
| Intercept           | -3.414   | 0.958 | -3.56 | 0.00037 | 0.0329     | 0.00503                 | 0.215  |
| Membrane OD/cut-off | 1.619    | 0.597 | 2.71  | 0.00666 | 5.0489     | 1.56768                 | 16.261 |
| Nucl_OD/cutoff      | 0.365    | 0.203 | 1.79  | 0.07312 | 1.4399     | 0.96642                 | 2.145  |

**Interaction, Membrane-Nucleocapsid, main effect.** As observed for the Spike protein, the interaction between IgG anti-M antibodies and IgG anti-Nucleocapsid antibodies, analysed by the logit function, resulted in a loss of statistical significance for the Nucleocapsid protein and a lower odds ratio for the M protein.

## Supplementary Table S4

| Target genes | Oligonucleotides 5'-3'                            | Bps position<br>NC_045512 | Restriction<br>enzymes | Recombinant<br>proteins |
|--------------|---------------------------------------------------|---------------------------|------------------------|-------------------------|
| S1 forward   | <i>GATCGAT<u>GATCCT</u>GGCACCTTGACCCTCTCTCAG</i>  | 22436-22454               | BamHI                  | YP_009724390            |
| S1 reverse   | <i>AGCTTCAAGCTTTAAAGAGTAGTGTCAGCAATGTCTC</i>      | 23281-23262               | HindIII                | AA 292-573              |
| N forward    | <i>GATCGAT<u>GATCCG</u>AATGTCTGATAATGGACCCCAA</i> | 28273-28295               | BamHI                  | YP_009724397            |
| N reverse    | <i>CGGATCAAGCTTTTATCTAGCAGGAGAAGTTCCCCTA</i>      | 287900-28879              | HindIII                | AA 1-209                |
| M forward    | <i>GATCGAT<u>GATCCCC</u>ATGTGGTCATTCAATCCA</i>    | 26846-26864               | BamHI                  | YP_009724393            |
| M reverse    | <i>AGCTTCAAGCTTTTACTGTACAAGCAAAGCAATAT</i>        | 27191-27169               | HindIII                | AA 109-222              |

**Primers used to produce the recombinant proteins.** The table shows the three pairs of oligonucleotides used to amplify and clone the three coding sequences. The underlined sequences indicate the restriction sites used for cloning. The bases position of the resulting amplicons and the protein fragments produced with their respective accession numbers are also shown. S = Spike; N = Nucleocapsid; M = Membrane.

## Supplementary Table S5

Contingency Table

| Lung injury | AB0 |    |   |    | Total |
|-------------|-----|----|---|----|-------|
|             | A   | AB | B | 0  |       |
| 0           | 12  | 3  | 4 | 4  | 23    |
| 1           | 5   | 0  | 3 | 13 | 21    |
| Total       | 17  | 3  | 7 | 17 | 44    |

$\chi^2$  Test

|          | Value | df | p      |
|----------|-------|----|--------|
| $\chi^2$ | 10.7  | 1  | 0.0133 |
| N        | 63    |    |        |

Effect size

|            | Value |
|------------|-------|
| Cramer's V | 0.494 |

**Supplementary Table S5. Correlation between AB0 blood group and lung injury.** Data on AB0 blood group were available for 44 subjects. The blood group distribution is shown stratified by lung injury (lung injury: 0 = absence; 1 = presence) together with the result of the  $\chi^2$  association test and the effect size.

## Supplementary Table S6

### Contingency Tables

| Age 0-1 | Lung injury |    | Total |
|---------|-------------|----|-------|
|         | 0           | 1  |       |
| 0       | 7           | 0  | 7     |
| 1       | 26          | 29 | 55    |
| Total   | 33          | 29 | 62    |

### $\chi^2$ Test

|                     | Value | df | p      |
|---------------------|-------|----|--------|
| $\chi^2$            | 6.93  | 1  | 0.0084 |
| Fisher's exact test |       |    | 0.012  |
| N                   | 63    |    |        |

### Effect size

|            | Value |
|------------|-------|
| Cramer's V | 0.334 |

**Supplementary Table S6. Correlation between age and lung injury.** Subjects were classified into two subgroups by age (age <30 years = 0; age >30 years = 1), stratified by lung injury (lung injury: 0 = absence; 1 = presence) and analyzed using the  $\chi^2$  association test.

## Supplementary Figure S1

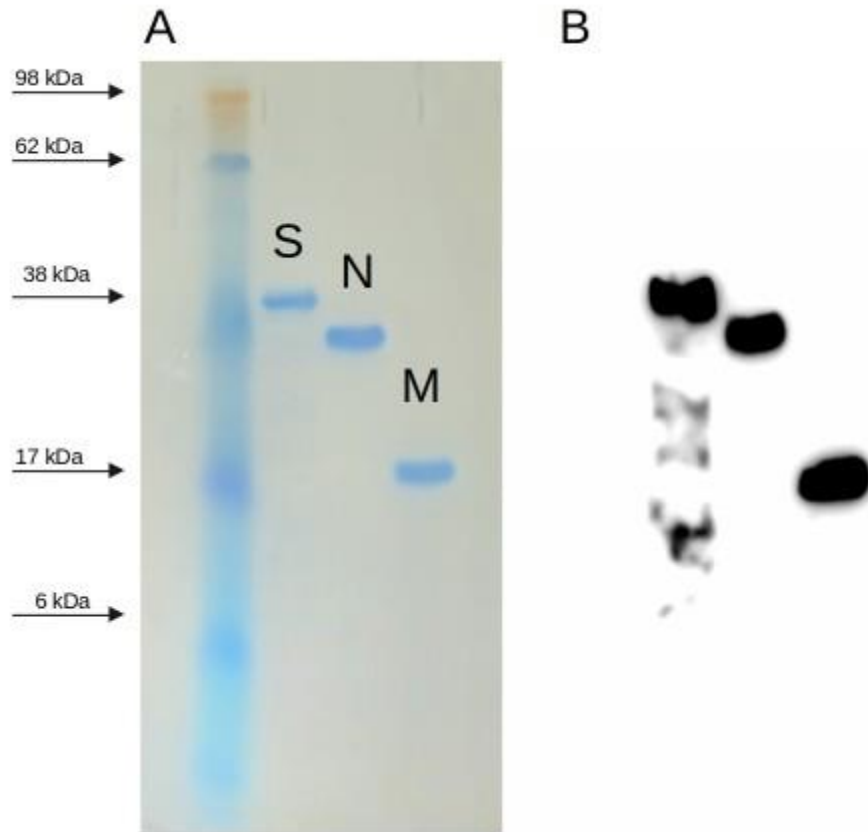

**Production of recombinant proteins.** In Panel A, the three recombinant proteins (Spike, Nucleocapsid, Membrane protein) separated by polyacrylamide gel electrophoresis (PAGE) and stained by Coomassie blue are shown. Panel B depicts a replicate of the same PAGE, where the proteins were subsequently blotted and detected by a monoclonal antibody targeting the polyhistidine tail of the fusion proteins. S = Spike; N = Nucleocapsid; M = membrane.
